# Supplementary material
Source: publisher figshare collection journal article supplement (https://acs.figshare.com/ndownloader/files/17411924)
Supplement: Supplementary file 1 [file 17411924]

# Supporting Information

## Injectable Catalyst-Free Poly (Propylene Fumarate) System Cross-Linked by Strain Promoted Alkyne-Azide Cycloaddition Click Chemistry for Spine Defect Filling

Xifeng Liu<sup>ab</sup>, A. Lee Miller II<sup>b</sup>, Hao Xu<sup>a</sup>, Brian E. Waletzki<sup>b</sup>, Lichun Lu<sup>\*ab</sup>

a Department of Physiology and Biomedical Engineering, Mayo Clinic, Rochester, MN 55905, USA

b Department of Orthopedic Surgery, Mayo Clinic, Rochester, MN 55905, USA.

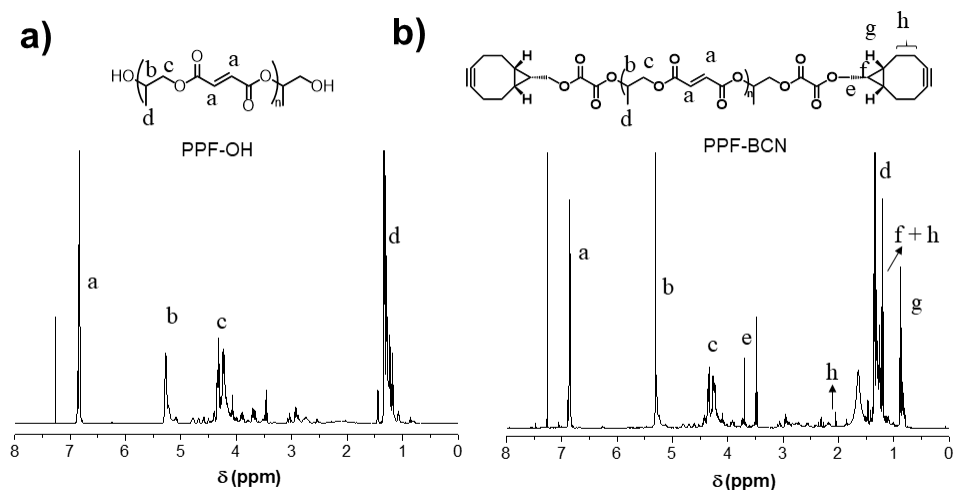

**Fig. S1** <sup>1</sup>H NMR spectrum and corresponding peaks of a) PPF-OH and b) PPF-BCN polymers.

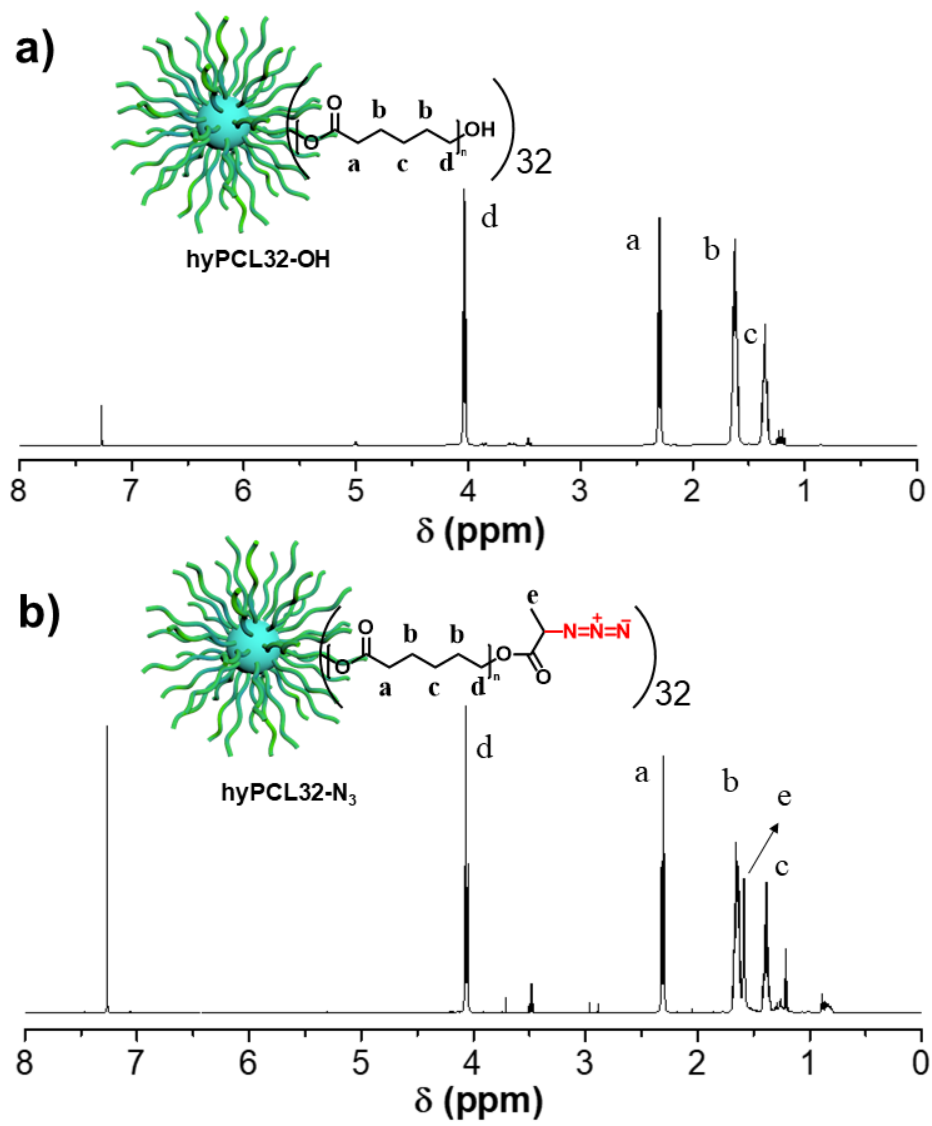

**Fig. S2**  $^1\text{H}$  NMR spectra and corresponding peaks of synthesized a) hyPCL32-OH and b) hyPCL32-N<sub>3</sub> dendrimer.

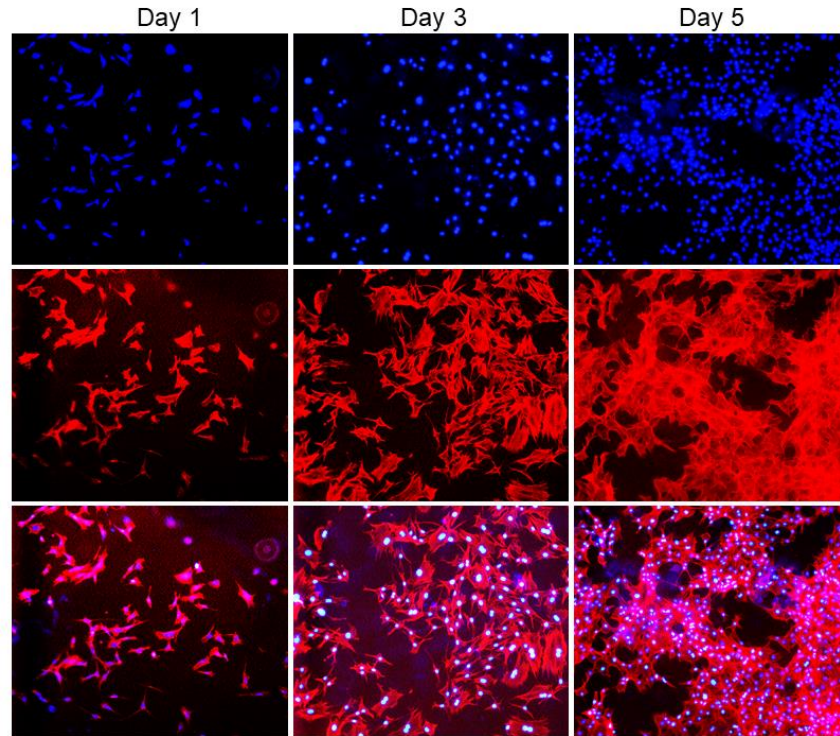

**Fig. S3** Fluorescence microscopy images of MC3T3 pre-osteoblast cells after 1, 3, and 5 days of culture on crosslinked PFCL-click scaffolds. Cellular filaments were stained with rhodamine-phalloidin (RP, red), and nuclei with 4',6-diamidino-2-phenylindole (DAPI, blue).

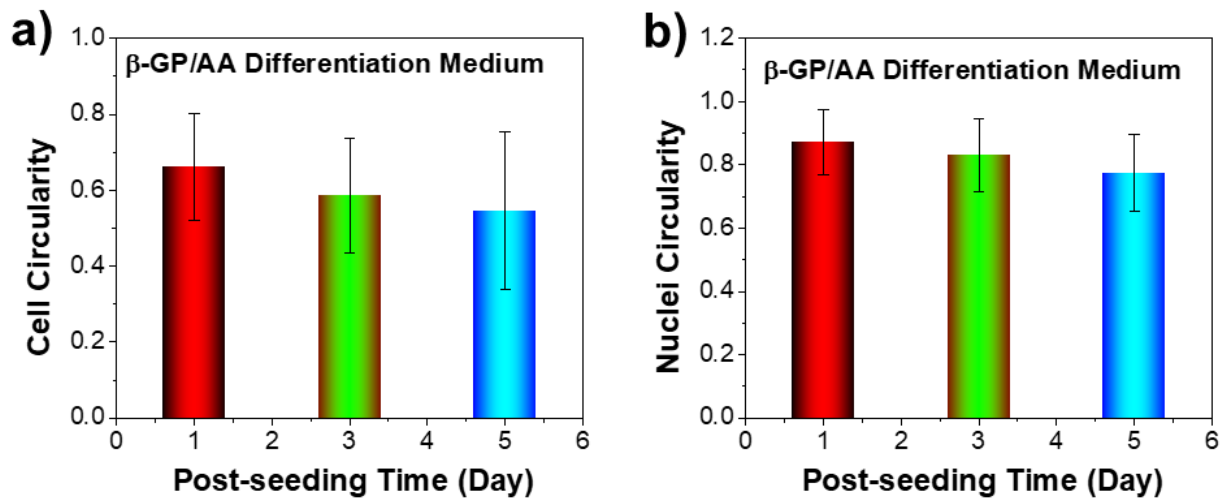

**Fig. S4** a) Cell circularity and b) nuclei circularity determined from confocal images of MC3T3 pre-osteoblast cells cultured on crosslinked PFCL-click scaffolds with  $\alpha$ -MEM/ $\beta$ -GP/AA osteogenic medium.

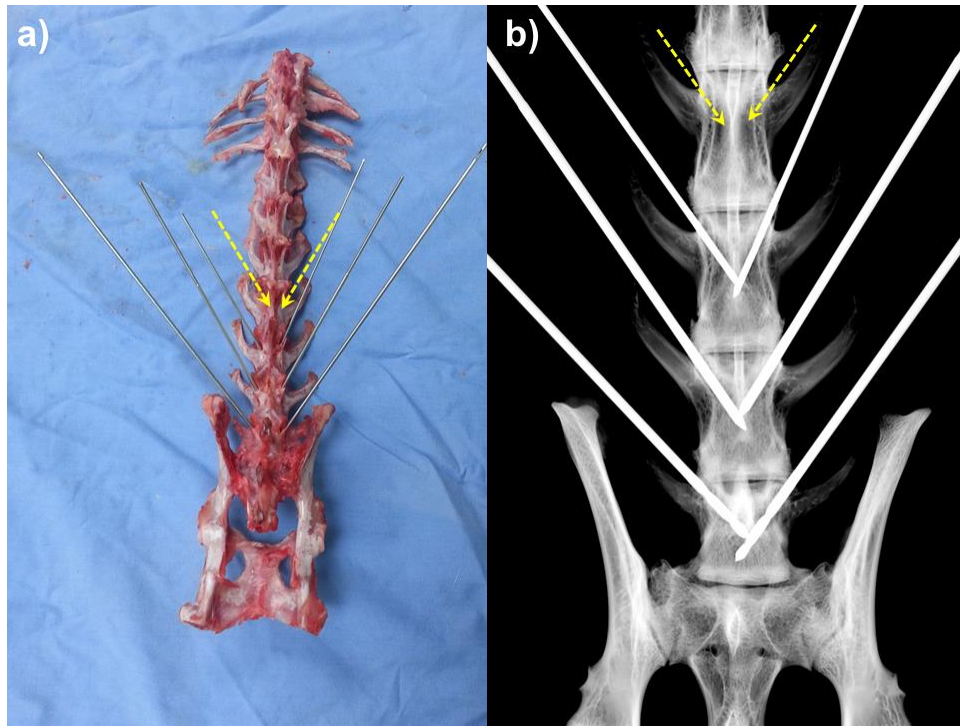

**Fig. S5** a) Photograph of creating injection cavity sites on the lateral sides of the rabbit vertebral bodies. b) X-ray imaging of the drilling position. Arrows indicate the injection site.
